# Supplementary material for: Grape Resveratrol Increases Serum Adiponectin and Downregulates Inflammatory Genes in Peripheral Blood Mononuclear Cells: A Triple-Blind, Placebo-Controlled, One-Year Clinical Trial in Patients with Stable Coronary Artery Disease
Source: PubMed Central journal article supplement — Cardiovasc Drugs Ther. 2012 Dec 8;27(1):37–48. doi: 10.1007/s10557-012-6427-8 (PMC3555235; doi:10.1007/s10557-012-6427-8), 2012-12-08
Supplement: 10557_2012_6427_MOESM1_ESM.pdf [file 10557_2012_6427_MOESM1_ESM.pdf]

## SUPPLEMENTARY METHODS AND TABLES

### **Grape Resveratrol Increases Serum Adiponectin and Downregulates Inflammatory Genes in Peripheral Blood Mononuclear Cells: A Triple-Blind, Placebo-Controlled, One-Year Clinical Trial in Patients with Stable Coronary Artery Disease.**

**João Tomé-Carneiro • Manuel González • Mar Larrosa •**

**María J. Yáñez-Gascón • Francisco J. García-Almagro • José A. Ruiz-Ros •**

**Francisco A. Tomás-Barberán • María T. García-Conesa • Juan Carlos Espín**

J. Tomé-Carneiro • M. Larrosa • M.J. Yáñez-Gascón • F.A. Tomás-Barberán • M.T. García-Conesa • J.C. Espín

Research Group on Quality, Safety and Bioactivity of Plant Foods, CEBAS-CSIC,

30100 Campus de Espinardo, Murcia, Spain

M. González • F.J. García-Almagro • J.A. Ruiz-Ros

Cardiology Service, Morales Meseguer University Hospital,

30008 Avda. Marqués de los Velez, Murcia, Spain.

J.C. Espín (✉)

Research Group on Quality, Safety and Bioactivity of Plant Foods, CEBAS-CSIC,

30100 Campus de Espinardo, Murcia, Spain

Tel: +34 968 396344, Fax: +34 968 396213.

e-mail: jcespin@cebas.csic.es

### **Supplementary Methods**

Peripheral blood mononuclear cells isolation

EDTA blood (BD Vacutainer, Franklin Lakes, NJ, USA) was processed within two hours after extraction and used to isolate peripheral blood mononuclear cells (PBMCs). Isolation was carried out under sterile conditions to avoid monocytes activation. Blood was diluted (1:1) with RPMI 1640 cell culture medium and centrifuged by density gradient with Histopaque-1077 (Sigma-Aldrich, Madrid, Spain) according to the manufacturer

instructions. The total number of cells isolated ( $11.1 \pm 3.9 \times 10^6$ ,  $n=54$ ) and their viability (95-100%) were estimated by Trypan blue. Isolated PBMCs were also analyzed by flow cytometry (FACSort, BD, San José, CA, USA) using size and granularity to estimate the proportion of lymphocytes, monocytes and granulocytes. Cell types' percentage (mean  $\pm$  SD) was: lymphocytes,  $84.4 \pm 2.9$ ; monocytes,  $13.0 \pm 3.2$  and granulocytes,  $2.2 \pm 1.0$ . PBMCs cells were obtained at baseline, after 6 months and at the end of the intervention (12 months). Cells were washed ( $\times 2$ ) with phosphate buffer solution (PBS), lysed in RLT buffer (Qiagen, Madrid, Spain) and stored at  $-80^\circ\text{C}$  for RNA extraction.

#### RNA extraction protocols

Total RNA was isolated from PBMCs using the AllPrep DNA/RNA/Protein Mini Kit (Qiagen, Madrid, Spain) following the manufacturer recommendations. RNA concentration and purity were checked using the Nanodrop ND-1000 UV-Vis Spectrophotometer (Nanodrop Technologies). Only samples with a ratio  $\text{Abs}_{260}/\text{Abs}_{280}$  between 1.8 and 2.1 were used in microarray experiments. The integrity of the ribosomal RNA was further checked using agarose gel electrophoresis (1%). Pure RNA samples were divided in aliquots and frozen at  $-80^\circ\text{C}$  until further analysis.

#### Human microarray analyses

A search for potential candidate genes expressed in the PBMCs for which transcription levels may have been modulated after the intake of GE or GE-RES was performed using GeneChip Human Gene 1.0 ST Array (Affymetrix, Santa Clara, CA). This array contains 764,885 distinct probe sets that interrogate approximately 28,869 well-annotated human genes. For microarray analyses a subpopulation of 18 male diabetic and hypertensive individuals (6 patients from each group) was selected from the total population of participants at the 3 different time points (baseline, after 6 months and after 12 months). Microarrays were performed on samples from individual patients (not pooled) for a total number of 54. For each sample, 250 ng of total RNA were processed according to the GeneChip<sup>®</sup> Whole Transcript (WT) Sense Target Labeling protocol (Affymetrix, Santa Clara, CA, USA). Amplified sense single-strand DNA was obtained using the Ambion<sup>®</sup> WT Expression Kit (Life Technologies) and 5.5  $\mu\text{g}$  of DNA were fragmented, labeled with the WT terminal Labeling

kit, and hybridized for 16 h at 45°C onto the chips. GeneChips were washed and stained in the Affymetrix Fluidics Station 450 and scanned using the GeneChip Scanner 3000.

#### Bioinformatic tools for statistical analysis

The CEL files were used to extract and normalize the data using Robust Multichip Average (RMA) implemented with the algorithm RMA Sketch for 1.0 ST arrays in the GeneChip Expression Console software version 1.1.2 (Affymetrix). RMA-normalized data were tested for differential gene expression between time points using the Class Comparison tool and an empirical Bayes method (Limma)<sup>1</sup> implemented with Babelomics (<http://babelomics.bioinfo.cipf.es/>) which performs well for small n microarrays.<sup>2</sup> Significant changes were defined as those with an adjusted P-value <0.05 (FDR, false discovery rate: 5%) and with ratios >1.2 (up-regulation) and <-1.2 (down-regulation).

#### Identification of biological functions and pathway construction

Data sets (differentially expressed genes) containing gene identifiers (Affymetrix probe sets) and corresponding expression values were uploaded into Ingenuity Pathway Analysis (IPA) software (Ingenuity<sup>®</sup> Systems, Redwood City, CA), a web-based biological data analysis application. Within IPA and based on prior knowledge stored in the Ingenuity Knowledge Base (IPKB), the Transcription Factor Analysis (TFA) identifies a number of putative upstream transcriptional regulators that may be activated or inactivated and implicated in the observed gene expression changes. The TFA tool provides a z-score that determines whether a transcriptional regulator has significantly more 'activated' predictions ( $z > 0$ ) or 'inhibited' predictions ( $z < 0$ ), where significance means that the observed number of 'activated' or 'inhibited' predictions are unlikely relative to randomly chosen predictions. In practice, z-scores greater than 2 or smaller than -2 are considered significant. IPA can visualize the networks of putative modulated regulators and their respective targets as well as their interactions to provide testable hypothesis for gene regulation in response to treatment. MIAME compliant data have been submitted to the Gene Expression Omnibus database (GEO, <http://www.ncbi.nlm.nih.gov/geo/>) with accession number GSE36930.

**References for Supplementary Methods (these references are not cited in the main text)**

1. Smyth GK. Linear models and empirical bayes methods for assessing differential expression in microarrays experiments. *Stat Appl Genet Mol Biol* 2004;3:article 3.
2. Murie C, Owen W, Lee AY, Nadon R. Comparison of small n statistical tests of differential expression applied to microarrays. *BMC Bioinformatics* 2009;10:45.

## Supplementary Tables

**Supplementary Table 1** Body mass index, blood pressure and serobiochemical variables after 12 months

|                                    | Experimental values after 12 months and intragroup <i>p</i> -values |                                   |                                     | Intergroup <i>p</i> -values (12 months) |       |      |
|------------------------------------|---------------------------------------------------------------------|-----------------------------------|-------------------------------------|-----------------------------------------|-------|------|
|                                    | A (Placebo)                                                         | B (GE)                            | C (GE-RES)                          | AvsB                                    | AvsC  | BvsC |
| Body mass index, kg/m <sup>2</sup> | 30.7±4.0<br><i>p</i> =0.94                                          | 31.4±4.7<br><i>p</i> =0.16        | 30.3±5.9<br><i>p</i> =0.55          | 0.09                                    | 0.70  | 0.59 |
| Systolic blood pressure, mmHg      | 130.6±19.5<br><i>p</i> =0.33                                        | 135.7±22.9<br><i>p</i> =0.07      | 134.9±22.6<br><i>p</i> =0.43        | 0.38                                    | 0.21  | 0.64 |
| Diastolic blood pressure, mmHg     | 73±10<br><i>p</i> =0.78                                             | 72±9<br><i>p</i> =0.51            | 74±12<br><i>p</i> =0.24             | 0.57                                    | 0.69  | 0.30 |
| Heart rate, beats per min          | 63±9<br><i>p</i> =0.06                                              | 59±1<br><i>p</i> =0.07            | 61±7<br><i>p</i> =0.26              | 0.13                                    | 0.26  | 0.57 |
| Total cholesterol, mg/dL (131-201) | 168.8±38.7<br><i>p</i> =0.29                                        | 157.1±33.5<br><i>p</i> =0.20      | 161.0±37.2*<br><i>p</i> =0.02 ↓2.7% | 0.01*                                   | 0.03* | 0.48 |
| HDLc, mg/dL (35-91)                | 41.3±7.9<br><i>p</i> =0.22                                          | 42.7±8.1<br><i>p</i> =0.68        | 42.4±8.1<br><i>p</i> =0.11          | 0.85                                    | 0.78  | 0.60 |
| LDLc, mg/dL (83-130)               | 89.9±37.1<br><i>p</i> =0.82                                         | 83.0±25.3<br><i>p</i> =0.56       | 91.4±29.5<br><i>p</i> =0.07         | 0.45                                    | 0.87  | 0.34 |
| LDLc/HDLc                          | 2.3±0.2<br><i>p</i> =0.70                                           | 2.0±0.1<br><i>p</i> =0.65         | 2.2±0.1<br><i>p</i> =0.32           | 0.25                                    | 0.77  | 0.36 |
| Non-HDLc, mg/dL                    | 127±8<br><i>p</i> =0.31                                             | 114±7*<br><i>p</i> =0.01 ↓10.2 %  | 119±7*<br><i>p</i> =0.03 ↓13.4 %    | 0.22                                    | 0.39  | 0.68 |
| Triglycerides, mg/dL (35-201)      | 155±85<br><i>p</i> =0.28                                            | 142±51<br><i>p</i> =0.65          | 124±52<br><i>p</i> =0.96            | 0.45                                    | 0.17  | 0.53 |
| Fibrinogen, g/L (2-4.5)            | 3.4±0.5<br><i>p</i> =0.39                                           | 3.4±0.6<br><i>p</i> =0.36         | 3.6±0.5<br><i>p</i> =0.35           | 0.88                                    | 0.25  | 0.31 |
| D-Dimer, mg/L (0-0.3)              | 0.14±0.08<br><i>p</i> =0.73                                         | 0.13±0.08<br><i>p</i> =0.95       | 0.12±0.07<br><i>p</i> =0.52         | 0.93                                    | 0.69  | 0.75 |
| GGT, U/L (1-24)                    | 41±22<br><i>p</i> =0.61                                             | 38±27<br><i>p</i> =0.67           | 40±38<br><i>p</i> =0.25             | 0.85                                    | 0.65  | 0.51 |
| AST, U/L (8-30)                    | 27±9<br><i>p</i> =0.18                                              | 24±7<br><i>p</i> =0.79            | 31±11<br><i>p</i> =0.85             | 0.90                                    | 0.33  | 0.25 |
| ALT, U/L (7-35)                    | 30±12<br><i>p</i> =0.53                                             | 31±15<br><i>p</i> =0.36           | 32±14<br><i>p</i> =0.72             | 0.73                                    | 0.44  | 0.65 |
| LDH, U/L (208-378)                 | 309±62<br><i>p</i> =0.71                                            | 333±41<br><i>p</i> =0.22          | 348±44<br><i>p</i> =0.30            | 0.45                                    | 0.21  | 0.59 |
| ALP, U/L (70-290)                  | 162±51*<br><i>p</i> =0.01 ↓12%                                      | 164±40<br><i>p</i> =0.15          | 161±45<br><i>p</i> =0.05            | 0.28                                    | 0.21  | 0.91 |
| CPK, U/L (26-140)                  | 169±132<br><i>p</i> =0.11                                           | 96±47<br><i>p</i> =0.21           | 129±44<br><i>p</i> =0.30            | 0.18                                    | 0.58  | 0.44 |
| Glucose, mg/dL (74-100)            | 123.0±34.0*<br><i>p</i> =0.00 ↑18%                                  | 129.2±28.3<br><i>p</i> =0.14      | 115.5±24.0<br><i>p</i> =0.87        | 0.17                                    | 0.00* | 0.09 |
| TSH, mU/L (0.35-5.5)               | 2.2±0.8<br><i>p</i> =0.35                                           | 1.9±1.1<br><i>p</i> =0.15         | 1.7±1.1<br><i>p</i> =0.59           | 0.52                                    | 0.17  | 0.51 |
| GIHB, % (6-7)                      | 6.8±1.6*<br><i>p</i> =0.00 ↑8.5%                                    | 6.6±0.6<br><i>p</i> =0.10         | 6.6±0.8<br><i>p</i> =0.32           | 0.01*                                   | 0.00* | 0.51 |
| T4, ng/dL (0.9-1.8)                | 1.2±0.1<br><i>p</i> =0.08                                           | 1.2±0.1<br><i>p</i> =0.97         | 1.2±0.2<br><i>p</i> =0.63           | 0.56                                    | 0.83  | 0.72 |
| Bilirubin, mg/dL (0.3-1.2)         | 0.5±0.1<br><i>p</i> =0.33                                           | 0.6±0.2<br><i>p</i> =0.251        | 0.5±0.2*<br><i>p</i> =0.04 ↓12.7%   | 0.28                                    | 0.49  | 0.08 |
| Creatinin, mg/dL (0.5-1.1)         | 1.0±0.3<br><i>p</i> =0.90                                           | 0.9±0.2<br><i>p</i> =0.44         | 0.9±0.2<br><i>p</i> =0.31           | 0.95                                    | 0.62  | 0.65 |
| Urate, mg/dL (2.6-6.1)             | 6.8±2.1<br><i>p</i> =0.35                                           | 6.0±1.3<br><i>p</i> =0.61         | 5.9±1.5<br><i>p</i> =0.41           | 0.64                                    | 0.50  | 0.70 |
| Albumin, g/L (34-48)               | 42.2±2.8<br><i>p</i> =0.34                                          | 46.4±3.2*<br><i>p</i> =0.00 ↑4.6% | 45.1±2.4<br><i>p</i> =0.13          | 0.03*                                   | 0.56  | 0.11 |

Values are expressed as mean±SD. GE, conventional grape extract; GE-RES, resveratrol-rich grape extract. \*Significant differences (*p*<0.05). The arrows designate the % of increase/decrease with respect to baseline values. Statistical analysis was carried out with the covariates described in the Methods section. *HDLc* high density lipoprotein-cholesterol, *LDLc* low density lipoprotein-cholesterol, *GGT* gamma-glutamyl transferase, *AST* aspartate aminotransferase, *ALT* alanine aminotransferase, *ALP* alkaline phosphatase, *LDH* lactate dehydrogenase, *CPK* creatine phosphokinase, *GIHB* glycosylated hemoglobin, *TSH* thyroid stimulant hormone, *T4* thyroxin

**Supplementary Table 2** Differentially expressed genes in the extracellular space as shown in Figure 4 and linked to regulation by the transcription factors listed in Table 4.

| Entrez Gene Name                                       | Symbol                           | Fold change    |              |              |                 |       |              |
|--------------------------------------------------------|----------------------------------|----------------|--------------|--------------|-----------------|-------|--------------|
|                                                        |                                  | After 6 months |              |              | After 12 months |       |              |
|                                                        |                                  | A              | B            | C            | A               | B     | C            |
| Interleukin 24                                         | <i>IL24</i>                      | NC             | NC           | -1.4         | -1.4            | -1.3  | <b>-1.5*</b> |
| Natriuretic peptide A                                  | <i>NPPA</i>                      | NC             | NC           | NC           | -1.2            | -1.24 | <b>-1.4*</b> |
| Cardiotrophin-like cytokine factor 1                   | <i>CLCF1</i>                     | NC             | NC           | NC           | NC              | NC    | <b>-1.3*</b> |
| Placental growth factor                                | <i>PGF</i>                       | NC             | NC           | NC           | NC              | NC    | <b>-1.8*</b> |
| Chemokine (C-C motif) ligand 22                        | <i>CCL22</i>                     | NC             | NC           | NC           | -1.2            | NC    | <b>-1.2*</b> |
| Chemokine (C-X3-C motif) ligand 1                      | <i>CX3CL1</i>                    | NC             | NC           | NC           | NC              | NC    | <b>-1.4*</b> |
| Interleukin 17C                                        | <i>IL17C</i>                     | NC             | NC           | NC           | NC              | NC    | <b>-1.4*</b> |
| Insulin-like growth factor binding protein 4           | <i>IGFBP4</i>                    | NC             | NC           | NC           | -1.2            | NC    | <b>-1.3*</b> |
| Gastrin                                                | <i>GAST</i>                      | NC             | <b>-1.4*</b> | NC           | -1.3            | -1.3  | <b>-1.3*</b> |
| Chemokine (C-C motif) ligand 3                         | <i>CCL3</i>                      | -2.3           | -1.5         | <b>-5.3*</b> | -2.9            | -3.4  | <b>-5.9*</b> |
| Melanoma inhibitory activity                           | <i>MIA</i>                       | -1.2           | NC           | NC           | NC              | NC    | <b>-1.4*</b> |
| Wingless-type MMTV integration site family, member 10A | <i>WNT10A</i>                    | NC             | NC           | NC           | NC              | -1.2  | <b>-1.2*</b> |
| Surfactant protein B                                   | <i>SFTPB</i>                     | NC             | NC           | NC           | NC              | NC    | <b>-1.3*</b> |
| Interleukin 1, beta                                    | <i>IL-1<math>\beta</math></i>    | -1.9           | NC           | -2.3         | -3.6            | -2.9  | <b>-3.5*</b> |
| Collagen, type XVIII, alpha 1                          | <i>COL18<math>\alpha</math>1</i> | NC             | NC           | NC           | NC              | NC    | <b>-1.2*</b> |
| Thyrotropin-releasing hormone                          | <i>TRH</i>                       | NC             | NC           | NC           | NC              | NC    | <b>-1.2*</b> |
| Interleukin 8                                          | <i>IL-8</i>                      | -2.7           | NC           | -2.9         | -3.0            | -2.1  | <b>-3.5*</b> |
| Chemokine (C-X-C motif) ligand 6                       | <i>CXCL6</i>                     | NC             | NC           | NC           | NC              | NC    | <b>-1.2*</b> |
| Chemokine (C-X-C motif) ligand 2                       | <i>CXCL2</i>                     | -3.2           | NC           | -2.4         | -3.4            | -1.7  | <b>-2.3*</b> |
| Interleukin 3                                          | <i>IL3</i>                       | NC             | NC           | NC           | NC              | NC    | <b>-2.4*</b> |
| Interleukin 13                                         | <i>IL13</i>                      | NC             | NC           | NC           | NC              | NC    | <b>-1.3*</b> |
| Tumor necrosis factor                                  | <i>TNF</i>                       | -1.3           | NC           | <b>-3.2*</b> | -1.8            | -2.0  | <b>-4.1*</b> |
| Interleukin 17A                                        | <i>IL17A</i>                     | NC             | NC           | NC           | NC              | NC    | <b>-1.3*</b> |
| Connective tissue growth factor                        | <i>CTGF</i>                      | NC             | NC           | NC           | NC              | NC    | <b>-1.2*</b> |
| Sonic hedgehog                                         | <i>SHH</i>                       | NC             | NC           | NC           | NC              | NC    | <b>-1.3*</b> |
| Interferon, beta 1, fibroblast                         | <i>IFN<math>\beta</math>1</i>    | NC             | NC           | NC           | NC              | NC    | <b>-1.2*</b> |
| Lymphotoxin alpha (TNF superfamily, member 1)          | <i>LTA</i>                       | NC             | NC           | NC           | NC              | -1.3  | <b>-1.3*</b> |

A Placebo group, B GE group (conventional grape extract), C GE-RES group (resveratrol-rich grape extract), NC no change. Fold change cut off > 1.2. \*Adjusted  $p < 0.05$

**Supplementary Table 3** Description of the extracellular space genes related to inflammatory transcription factors shown in Figure 4 and listed in Table 4.

| <b>Symbol</b>                 | <b>Description</b>                                                                                                                                  | <b>References (Suppl. Table 3)</b> |
|-------------------------------|-----------------------------------------------------------------------------------------------------------------------------------------------------|------------------------------------|
| <i>IL24</i>                   | Cytokine involved in cell survival and proliferation                                                                                                | 1                                  |
| <i>NPPA</i>                   | Plays a key role in cardiovascular homeostasis                                                                                                      | 2                                  |
| <i>CLCF1</i>                  | Cytokine from IL-6 family with B-cell stimulating capability. It induces IL1 $\beta$ and serum amyloid A.                                           | 3                                  |
| <i>PGF</i>                    | Stimulates proliferation and migration of endothelial cells. It induces PAI-1 through AP1 and JUN pathways. Present in unstable plaque.             | 4                                  |
| <i>CCL22</i>                  | Chemokine that may play a role in the trafficking of activated T lymphocytes to inflammatory sites                                                  | 5                                  |
| <i>CX3CL1</i>                 | Fractalkine. Chemokine that elicits leukocyte adhesive and migratory functions. It is overexpressed in unstable angina and promotes unstable plaque | 6                                  |
| <i>IL17C</i>                  | Cytokine that stimulates the release of TNF $\alpha$ and IL1 $\beta$ from the monocytic cell line THP-1                                             | 7                                  |
| <i>IGFBP4</i>                 | Related to Wnt/ $\beta$ -catenin pathway in cancer promotion. Stimulates circulating human hematopoietic stem and progenitor cells CD34/CD133.      | 8                                  |
| <i>GAST</i>                   | Acts as a potent cell-growth factor                                                                                                                 | 9                                  |
| <i>CCL3</i>                   | Overexpressed in AMI and unstable angina with poor prognosis. Recruitment and activation of polymorphonuclear leukocytes                            | 10                                 |
| <i>MIA</i>                    | Growth regulating protein involved in cell proliferation                                                                                            | 11                                 |
| <i>WNT10A</i>                 | Involved in the cellular response to transforming growth factor $\beta$ stimulus                                                                    | 12                                 |
| <i>SFTPB</i>                  | Circulating SFTPB levels are increased in patients with Chronic Heart Failure                                                                       | 13                                 |
| <i>IL-1<math>\beta</math></i> | Cytokine involved in cell proliferation, differentiation and apoptosis. Important mediator of the inflammatory response                             | 14                                 |
| <i>COL18A1</i>                | Endostatin precursor, a potent antiangiogenic protein leads to increased leukocyte-vessel wall interactions. Higher levels in diabetics with CAD.   | 15                                 |
| <i>TRH</i>                    | Among other roles, evidence supports a critical role in the T-cell dependent immune response                                                        | 16                                 |
| <i>IL-8</i>                   | Chemoattractant cytokine that is also a potent angiogenic factor. Important mediator of the inflammatory response                                   | 17                                 |
| <i>CXCL6</i>                  | Chemoattractant chemokine for neutrophilic granulocytes                                                                                             | 18                                 |
| <i>CXCL2</i>                  | Chemotactic chemokine for polymorphonuclear leukocytes and hematopoietic stem cells                                                                 | 19                                 |
| <i>IL3</i>                    | Cytokine that could stimulate colony formation by macrophages, granulocytes, eosinophils, mast cells, among others                                  | 20                                 |
| <i>IL13</i>                   | Cytokine with a potent immunoregulatory role                                                                                                        | 21                                 |
| <i>TNF</i>                    | Cytokine involved in the regulation of several biological processes including cell proliferation, differentiation and apoptosis                     | 22                                 |
| <i>IL17A</i>                  | Cytokine that modulates immune cell trafficking and may contribute to atherosclerosis and plaque instability                                        | 23                                 |
| <i>CTGF</i>                   | Growth factor that can promote endothelial cell growth, migration, adhesion and survival                                                            | 24                                 |
| <i>SHH</i>                    | Potent chemoattractant for monocytes. Involved in inflammation via NF- $\kappa$ B. Promotes vascular smooth muscle cells proliferation.             | 25                                 |
| <i>IFN<math>\beta</math></i>  | Type I IFNs, among other effects, activate macrophages and NK cells and promote T cell survival                                                     | 26                                 |
| <i>LTA</i>                    | Cytokine that mediates a large variety of inflammatory, immunostimulatory, and antiviral responses                                                  | 27                                 |

### References for Supplementary Table 3 (these references are not cited in the main text)

1. Poindexter NJ, Walch ET, Chada S, Grimm EA. Cytokine induction of interleukin-24 in human peripheral blood mononuclear cells. *J Leukoc Biol.* 2005;78:745-52.
2. Annilo T, Kepp K, Laan M. Natural antisense transcript of natriuretic peptide precursor A (NPPA): structural organization and modulation of NPPA expression. *BMC Mol Biol.* 2009;10:81.
3. Senaldi G, Varnum BC, Sarmiento U, Starnes C, Lile J, Scully S, et al. Novel neurotrophin-1/B cell-stimulating factor-3: a cytokine of the IL-6 family. *Proc Natl Acad Sci USA.* 1999;96:11458-63.
4. Khurana R, Moons L, Shafi S, Luttun A, Collen D, Martin JF, et al. Placental growth factor promotes atherosclerotic intimal thickening and macrophage accumulation. *Circulation.* 2005;111:2828-36.
5. Chang MS, McNinch J, Elias C, Manthey CL, Grosshans D, Meng T, et al. Molecular cloning and functional characterization of a novel CC chemokine, stimulated T cell chemotactic protein (STCP-1) that specifically acts on activated T lymphocytes. *J Biol Chem.* 1997;272:25229-37.
6. Ikejima H, Imanishi T, Tsujioka H, Kashiwagi M, Kuroi A, Tanimoto T, et al. Upregulation of fractalkine and its receptor, CX3CR1, is associated with coronary plaque rupture in patients with unstable angina pectoris. *Circ J.* 2010;74:337-45.
7. Li H, Chen J, Huang A, Stinson J, Heldens S, Foster J, et al. Cloning and characterization of IL-17B and IL-17C, two new members of the IL-17 cytokine family. *Proc Natl Acad Sci USA.* 2000;97:773-8.
8. Ueno K, Hirata H, Majad S, Tabatabai ZL, Hinoda Y, Dahiya R. IGFBP-4 activates the Wnt/ $\beta$ -catenin signaling pathway and induces M-CAM expression in human renal cell carcinoma. *Int J Cancer* 2011;129:2360-9.
9. Rozengurt E, Walsh JH. Gastrin, CCK, signaling, and cancer. *Annu Rev Physiol.* 2001;63:49-76.
10. de Pater SC, Kraaijeveld AO, Grauss RW, de Jager W, Liem SS, van der Hoeven BL, et al. CCL3 (MIP-1  $\alpha$ ) levels are elevated during acute coronary syndromes and show strong prognostic power for future ischemic events. *J Mol Cell Cardiol.* 2008;45:446-52.
11. Blesch A, Bosserhoff AK, Apfel R, Behl C, Hessdoerfer B, Schmitt A, et al. Cloning of a novel malignant melanoma-derived growth-regulatory protein, MIA. *Cancer Res.* 1994;54:5695-701.
12. Zhou S, Eid K, Glowacki J. Cooperation between TGF- $\beta$  and Wnt pathways during chondrocyte and adipocyte differentiation of human marrow stromal cells. *J Bone Miner Res.* 2004;19:463-70.



13. De Pasquale CG, Arnolde LF, Doyle IR, Aylward PE, Chef DP, Bersten AD. Plasma surfactant protein-B: A novel biomarker in chronic heart failure. *Circulation*. 2004;110:1091-6.
14. March CJ, Mosley B, Larsen A, Cerretti DP, Braedt G, Price V, et al. Cloning, sequence and expression of two distinct human interleukin-1 complementary DNAs. *Nature*. 1985;315:641-7.
15. Sodha NR, Clements RT, Boodhwani M, Xu SH, Laham RJ, Bianchi C, et al. Endostatin and angiostatin are increased in diabetic patients with coronary artery disease and associated with impaired coronary collateral formation. *Am J Physiol Heart Circ Physiol*. 2009;296:428-34.
16. Kamath J, Yarbrough GG, Orange AJ Jr, Winokur A. The thyrotropin-releasing hormone (TRH)-immune system homeostatic hypothesis. *Pharmacol Ther*. 2009;121:20-8.
17. Hebert CA, Baker JB. Interleukin-8: a review. *Cancer Invest*. 1993;11:743-50.
18. Proost P, Wuyts A, Conings R, Lenaerts JP, Billiau A, Opdenakker G, et al. Human and bovine granulocyte chemotactic protein-2: complete amino acid sequence and functional characterization as chemokines. *Biochemistry* 1993;32:10170-1.
19. Wolpe SD, Sherry B, Juers D, Davatelis G, Yurt RW, Cerami A. Identification and characterization of macrophage inflammatory protein 2. *Proc Nat Acad Sci*. 1989;86:612-6.
20. Metcalf D, Begley CG, Nicola N, Johnson GR. Quantitative responsiveness of murine hemopoietic populations *in vitro* and *in vivo* recombinant multi-CSF (IL-3). *Exp Hematol*. 1987;15:288-95.
21. Hershey GK. IL-13 receptors and signaling pathways: an evolving web. *J Allergy Clin Immunol*. 2003;111:677-90.
22. Bradley J. TNF-mediated inflammatory disease. *J Pathol*. 2008;214:149-60.
23. Erbel C, Dengler TJ, Wangler S, Bea F, Wanbsganss N, Hakimi M, et al. Expression of IL-17A in human atherosclerotic lesions is associated with increased inflammation and plaque vulnerability. *Basic Res Cardiol*. 2011;106:125-34.
24. Brigstock DR. Regulation of angiogenesis and endothelial cell function by connective tissue growth factor (CTGF) and cysteine-rich 61 (CYR61). *Angiogenesis*. 2002;5:153-65.
25. Lowrey JA, Stewart GA, Lindey S, Hoyne GF, Dallman MJ, Howie SE, et al. Sonic hedgehog promotes cell cycle progression in activated peripheral CD4(+) T lymphocytes. *J Immunol*. 2002;169:1869-75.
26. Theofilopoulos AN, Baccala R, Beutler B, Kono DH. Type I interferons ( $\alpha/\beta$ ) in immunity and autoimmunity. *Annu Rev Immunol*. 2005;23:307-36.

27. Nedwin GE, Naylor SL, Sakaguchi AY, Smith D, Jarrett-Nedwin J, Pennica D, et al. Human lymphotoxin and tumor necrosis factor genes: structure, homology and chromosomal localization. *Nucleic Acids Res.* 1985;13:6361-73.
